# Supplementary material
Source: PubMed Central journal article supplement (PMC10389669)

**Supplemental content for  
Sporadic Primary Pheochromocytoma: A Prospective Intraindividual  
Comparison of Six Imaging Tests (CT, MRI, and PET/CT Using <sup>68</sup>Ga-DOTATATE,  
FDG, <sup>18</sup>F-FDOPA, and <sup>18</sup>F-FDA)**

*Abhishek Jha, MD, Mayank Patel, MD, Jorge A. Carrasquillo, MD, Alexander Ling, MD, Corina Millo, MD, Babak Saboury, MD, MPH, Clara C. Chen, MD, Paul Wakim, PhD, Melissa K. Gonzales, BS, Leah Meuter, BS, Marianne Knue, CRNP, Sara Talvacchio, RN, Peter Herscovitch, MD, Jaydira Del Rivero, MD, Alice P. Chen, MD, Naris Nilubol, MD, David Taïeb, MD, PhD, Frank I. Lin, MD, Ali Cahid Civelek, MD, Karel Pacak, MD, PhD, DSc*

[doi.org/10.2214/AJR.21.26071](https://doi.org/10.2214/AJR.21.26071)

Published online: August 25, 2021

The authors have supplied these materials to give readers additional information about the work.

**Table S1**-Clinical characteristics of patients with histologically-confirmed sporadic adrenal pheochromocytoma and study results for CT<sup>a</sup> and MRI

| Patient | Age (y) | Hypersecretion <sup>b</sup> | Laterality of Lesion | Lesion size <sup>c</sup> (cm) | Conspicuity Score on CT |    | Positivity for PHEO <sup>e</sup> (CT) | Conspicuity Score on MRI |    | Positivity for PHEO <sup>e</sup> (MRI) |
|---------|---------|-----------------------------|----------------------|-------------------------------|-------------------------|----|---------------------------------------|--------------------------|----|----------------------------------------|
|         |         |                             |                      |                               | R1 <sup>d</sup>         | R2 |                                       | R1 <sup>d</sup>          | R2 |                                        |
| 1       | 29      | EPI, NE, NMN, DA, CgA       | Left                 | 6.4                           | 5                       | 4  | +                                     | 5                        | 5  | +                                      |
| 2       | 58      | EPI, MN, NE, NMN, CgA       | Right                | 3.2                           | NA                      | NA | NA                                    | 5                        | 5  | +                                      |
| 3       | 67      | MN, NMN, DA                 | Left                 | 6.1                           | 5                       | 4  | +                                     | NA                       | NA | NA                                     |
| 4       | 44      | NE, NMN, DA                 | Right                | 2.0                           | 3                       | 3  | -                                     | 4                        | 5  | +                                      |
| 5       | 20      | NE, NMN, DA, CgA            | Right                | 3.7                           | 5                       | 4  | +                                     | 5                        | 5  | +                                      |
| 6       | 74      | EPI, MN, NMN, CgA           | Left                 | 3.4                           | 5                       | 4  | +                                     | 5                        | 5  | +                                      |
| 7       | 54      | MN, NMN, DA, CgA            | Right                | 3.0                           | 5                       | 5  | +                                     | 5                        | 5  | +                                      |
| 8       | 70      | EPI, MN, NE, NMN, DA, CgA   | Right                | 3.1                           | 3                       | 3  | -                                     | NA                       | NA | NA                                     |
| 9       | 49      | MN, NMN, DA, CgA            | Right                | 2.6                           | 3                       | 3  | -                                     | 5                        | 5  | +                                      |
| 10      | 55      | EPI, MN, NE, NMN, DA, CgA   | Left                 | 9.5                           | 3                       | 3  | -                                     | 4                        | 5  | +                                      |
| 11      | 44      | NE, NMN, CgA                | Right                | 9.0                           | 4                       | 4  | +                                     | 4                        | 4  | +                                      |
| 12      | 75      | EPI, MN, NMN, DA, CgA       | Left                 | 5.5                           | 5                       | 4  | +                                     | 5                        | 5  | +                                      |
| 13      | 51      | NE, NMN, DA, CgA            | Left                 | 7.5                           | NA                      | NA | NA                                    | 4                        | 4  | +                                      |
| 14      | 35      | EPI, MN, NE, NMN, CgA       | Right                | 8.0                           | 5                       | 5  | +                                     | 5                        | 5  | +                                      |

<sup>a</sup>Performed using a single portal-venous phase as part of a whole-body staging CT examination

<sup>b</sup>Based on plasma biochemical evaluation

<sup>c</sup>Based on histopathologic analysis of surgically resected lesion

<sup>d</sup>Conspicuity scores from R1 were used for subsequent analysis.

<sup>e</sup>Lesion deemed negative for PHEO for conspicuity score of 1-3 and positive for PHEO for conspicuity score of 4-5

CgA = chromogranin A; DA = dopamine; EPI = epinephrine; MN = metanephrine; NA = not available (patient did not undergo given imaging examination); PHEO = pheochromocytoma; R1 = reader 1; R2 = reader 2

**Table S2**-Patient-level SUV<sub>max</sub> measurements, conspicuity scores, and lesion positivity results for <sup>68</sup>Ga-DOTATATE PET/CT

| Patient | SUV <sub>max</sub> Measurements <sup>a</sup> |                                          |                                                |                           |                          | Conspicuity Score <sup>b</sup> |    | Lesion Positivity for PHEO |
|---------|----------------------------------------------|------------------------------------------|------------------------------------------------|---------------------------|--------------------------|--------------------------------|----|----------------------------|
|         | Lesion <sup>a</sup>                          | Contralateral <sup>b</sup> Adrenal Gland | Ratio of Lesion to Contralateral Adrenal Gland | Normal <sup>b</sup> Liver | Ratio of Lesion to Liver | R1                             | R2 |                            |
| 1       | 34.7                                         | 21.1                                     | 1.7                                            | 7.6                       | 4.6                      | 5                              | 5  | +                          |
| 2       | 71.5                                         | 28.1                                     | 2.6                                            | 8.8                       | 8.1                      | 5                              | 5  | +                          |
| 3       | 52.7                                         | 46.8                                     | 1.1                                            | 13.5                      | 3.9                      | 5                              | 5  | +                          |
| 4       | 36.0                                         | 35.8                                     | 1.0                                            | 12.2                      | 3.0                      | 5                              | 4  | +                          |
| 5       | 28.9                                         | 20.9                                     | 1.4                                            | 14.1                      | 2.1                      | 5                              | 5  | +                          |
| 6       | 21.7                                         | 31.4                                     | 0.7                                            | 10.7                      | 2.0                      | 3                              | 2  | -                          |
| 7       | 99.4                                         | 42.2                                     | 2.4                                            | 9.0                       | 11.0                     | 5                              | 5  | +                          |
| 8       | 36.9                                         | 10.0                                     | 3.7                                            | 7.5                       | 4.9                      | 5                              | 5  | +                          |
| 9       | 34.6                                         | 31.9                                     | 1.1                                            | 13.4                      | 2.6                      | 3                              | 2  | -                          |
| 10      | 15.0                                         | 11.7                                     | 1.3                                            | 10.3                      | 1.5                      | 5                              | 4  | +                          |
| 11      | 16.7                                         | 25.6                                     | 0.7                                            | 10.4                      | 1.6                      | 4                              | 4  | +                          |
| 12      | 37.5                                         | 34.6                                     | 1.1                                            | 9.6                       | 3.9                      | 2                              | 1  | -                          |
| 13      | 94.8                                         | 49.8                                     | 1.9                                            | 14.9                      | 6.4                      | 5                              | 5  | +                          |
| 14      | 30.5                                         | 20.9                                     | 1.5                                            | 11.5                      | 2.7                      | 5                              | 5  | +                          |

<sup>a</sup>SUV<sub>max</sub> measurements of adrenal lesions were obtained by R1 and of contralateral adrenal gland and liver by R2.

<sup>b</sup>Conspicuity scores of R1 were used for subsequent analyses when the readers' dichotomized scores were concordant for whether lesion was negative (conspicuity score of 1-3) or positive (conspicuity score of 4-5).

PHEO = pheochromocytoma; R1 = reader 1; R2 = reader 2

**Table S3**-Patient-level SUV<sub>max</sub> measurements, conspicuity scores, and lesion positivity results for FDG PET/CT

| Patient | SUV <sub>max</sub> Measurements <sup>a</sup> |                             |                                                |              |                          | Conspicuity Score <sup>b</sup> |          | Lesion Positivity for PHEO |
|---------|----------------------------------------------|-----------------------------|------------------------------------------------|--------------|--------------------------|--------------------------------|----------|----------------------------|
|         | Lesion                                       | Contralateral Adrenal Gland | Ratio of Lesion to Contralateral Adrenal Gland | Normal Liver | Ratio of Lesion to Liver | R1                             | R2       |                            |
| 1       | 9.9                                          | 9.2                         | 1.1                                            | 3.2          | 3.1                      | 5                              | 5        | +                          |
| 2       | 5.7                                          | 3.1                         | 1.8                                            | 3.7          | 1.5                      | 5                              | 4        | +                          |
| 3       | 11.0                                         | 6.7                         | 1.6                                            | 6.8          | 1.6                      | 3                              | <b>4</b> | +                          |
| 4       | 5.6                                          | 4.6                         | 1.2                                            | 4.3          | 1.3                      | 1                              | 2        | -                          |
| 5       | 20.9                                         | 3.2                         | 6.5                                            | 4.3          | 4.9                      | 5                              | 5        | +                          |
| 6       | 6.8                                          | 4.5                         | 1.5                                            | 3.3          | 2.1                      | 5                              | 5        | +                          |
| 7       | 3.6                                          | 3.1                         | 1.2                                            | 3.6          | 1.0                      | 1                              | 1        | -                          |
| 8       | 12.2                                         | 12.0                        | 1.0                                            | 1.9          | 6.3                      | 5                              | 4        | +                          |
| 9       | 11.5                                         | 4.1                         | 2.8                                            | 4.0          | 2.9                      | 3                              | <b>5</b> | +                          |
| 10      | 19.0                                         | 4.2                         | 4.5                                            | 2.9          | 6.6                      | 5                              | 5        | +                          |
| 11      | 19.0                                         | 6.6                         | 2.9                                            | 3.5          | 5.4                      | 5                              | 5        | +                          |
| 12      | 10.4                                         | 4.4                         | 2.4                                            | 3.4          | 3.1                      | 5                              | 5        | +                          |
| 13      | 5.2                                          | 4.6                         | 1.2                                            | 4.1          | 1.3                      | 4                              | 4        | +                          |
| 14      | 6.5                                          | 2.9                         | 2.3                                            | 4.4          | 1.5                      | 2                              | 1        | -                          |

<sup>a</sup>SUV<sub>max</sub> measurements of lesions were obtained by R1 and of contralateral adrenal gland and liver by R2

<sup>b</sup>Conspicuity scores of R1 were used for subsequent analyses when the readers' dichotomized scores were concordant for whether lesion was negative (conspicuity score of 1-3) or positive (conspicuity score of 4-5). If readers were discrepant for whether lesion was negative or positive for PHEO, then a joint review was performed, and consensus score (indicated in bold) was used for subsequent analyses.

NA = not available; PHEO = pheochromocytoma; R1 = reader 1; R2 = reader 2

**Table S4**-Patient-level SUV<sub>max</sub> measurements, conspicuity scores, and lesion positivity results for <sup>18</sup>F-FDOPA PET/CT

| Patient | SUV <sub>max</sub> Measurements <sup>a</sup> |                             |                                                |              |                          | Conspicuity Score <sup>b</sup> |    | Lesion Positivity for PHEO |
|---------|----------------------------------------------|-----------------------------|------------------------------------------------|--------------|--------------------------|--------------------------------|----|----------------------------|
|         | Lesion                                       | Contralateral Adrenal Gland | Ratio of Lesion to Contralateral Adrenal Gland | Normal Liver | Ratio of Lesion to Liver | R1                             | R2 |                            |
| 1       | 45.8                                         | 5.5                         | 8.3                                            | 3.0          | 15.3                     | 5                              | 5  | +                          |
| 2       | NA                                           | NA                          | NA                                             | NA           | NA                       | NA                             | NA | NA                         |
| 3       | 25.4                                         | 11.7                        | 2.2                                            | 5.5          | 4.6                      | 5                              | 5  | +                          |
| 4       | 31.2                                         | 6.3                         | 4.9                                            | 3.7          | 8.3                      | 5                              | 5  | +                          |
| 5       | 33.1                                         | 4.6                         | 7.1                                            | 3.2          | 10.3                     | 5                              | 5  | +                          |
| 6       | NA                                           | NA                          | NA                                             | NA           | NA                       | NA                             | NA | NA                         |
| 7       | 23.0                                         | 6.7                         | 3.4                                            | 3.2          | 7.1                      | 5                              | 5  | +                          |
| 8       | NA                                           | NA                          | NA                                             | NA           | NA                       | NA                             | NA | NA                         |
| 9       | 14.5                                         | 7.4                         | 2.0                                            | 4.0          | 3.6                      | 5                              | 5  | +                          |
| 10      | 78.4                                         | 4.4                         | 17.7                                           | 2.9          | 27.0                     | 5                              | 5  | +                          |
| 11      | 64.9                                         | 8.2                         | 8.0                                            | 3.5          | 18.6                     | 5                              | 5  | +                          |
| 12      | 11.6                                         | 8.9                         | 1.3                                            | 2.6          | 4.5                      | 5                              | 5  | +                          |
| 13      | 40.7                                         | 7.6                         | 5.4                                            | 3.4          | 11.9                     | 5                              | 5  | +                          |
| 14      | 11.7                                         | 5.3                         | 2.2                                            | 2.8          | 4.1                      | 5                              | 5  | +                          |

<sup>a</sup>SUV<sub>max</sub> measurements of adrenal lesions were obtained by R1 and of contralateral adrenal gland and liver by R2.

<sup>b</sup>Conspicuity scores of R1 were used for subsequent analyses when the readers' dichotomized scores were concordant for whether lesion was negative (conspicuity score of 1-3) or positive (conspicuity score of 4-5).

NA = not available; PHEO = pheochromocytoma; R1 = reader 1; R2 = reader 2

**Table S5**-Patient-level SUV<sub>max</sub> measurements, conspicuity scores, and lesion positivity results for <sup>18</sup>F-FDA PET/CT

| Patient | SUV <sub>max</sub> Measurements <sup>a</sup> |                             |                                                |              |                          | Conspicuity Score <sup>b</sup> |    | Lesion Positivity for PHEO |
|---------|----------------------------------------------|-----------------------------|------------------------------------------------|--------------|--------------------------|--------------------------------|----|----------------------------|
|         | Lesion                                       | Contralateral Adrenal Gland | Ratio of Lesion to Contralateral Adrenal Gland | Normal Liver | Ratio of Lesion to Liver | R1                             | R2 |                            |
| 1       | 38.6                                         | 7.9                         | 4.9                                            | 9.5          | 4.1                      | 5                              | 5  | +                          |
| 2       | 50.0                                         | 17.9                        | 2.8                                            | 10.8         | 4.6                      | 5                              | 5  | +                          |
| 3       | 73.8                                         | 40.9                        | 1.8                                            | 15.7         | 4.7                      | 5                              | 5  | +                          |
| 4       | 20.8                                         | 18.9                        | 1.1                                            | 9.1          | 2.3                      | <b>3</b>                       | 4  | -                          |
| 5       | 28.1                                         | 8.3                         | 3.4                                            | 11.7         | 2.4                      | 5                              | 5  | +                          |
| 6       | NA                                           | NA                          | NA                                             | NA           | NA                       | NA                             | NA | NA                         |
| 7       | 32.4                                         | 16.1                        | 2.0                                            | 9.8          | 3.3                      | 5                              | 5  | +                          |
| 8       | NA                                           | NA                          | NA                                             | NA           | NA                       | NA                             | NA | NA                         |
| 9       | NA                                           | NA                          | NA                                             | NA           | NA                       | NA                             | NA | NA                         |
| 10      | NA                                           | NA                          | NA                                             | NA           | NA                       | NA                             | NA | NA                         |
| 11      | NA                                           | NA                          | NA                                             | NA           | NA                       | NA                             | NA | NA                         |
| 12      | NA                                           | NA                          | NA                                             | NA           | NA                       | NA                             | NA | NA                         |
| 13      | 31.4                                         | 17.2                        | 1.8                                            | 9.7          | 3.3                      | 4                              | 5  | +                          |
| 14      | NA                                           | NA                          | NA                                             | NA           | NA                       | NA                             | NA | NA                         |

<sup>a</sup>SUV<sub>max</sub> measurements of lesions were obtained by R1 and of contralateral adrenal gland and liver by R2

<sup>b</sup>Conspicuity scores of R1 were used for subsequent analyses when the readers' dichotomized scores were concordant for whether lesion was negative (conspicuity score of 1-3) or positive (conspicuity score of 4-5). If readers were discrepant for whether lesion was negative or positive for PHEO, then a joint review was performed, and consensus score (indicated in bold) was used for subsequent analyses.

NA = not available; PHEO = pheochromocytoma; R1 = reader 1; R2 = reader 2

**Figure S1.** Multimodality imaging of 44-year-old man (patient 4) with clinical suspicion for pheochromocytoma (PHEO) based on symptoms of anxiety, hot flashes, exertional palpitations, and sweating. Patient also had elevated plasma norepinephrine, dopamine, and normetanephrines, and right adrenal mass on prior CT. Maximum intensity projection PET images (A-D) and fused axial PET/CT images (E-H) using  $^{18}\text{F}$ -FDOPA (A, E),  $^{68}\text{Ga}$ -DOTATATE (B, F),  $^{18}\text{F}$ -FDA (C, G), and FDG (D, H), as well as axial T2-weighted MR image (I), and axial portal venous-phase contrast-enhanced CT image (J), show a right adrenal mass. Mass was deemed positive for PHEO on  $^{68}\text{Ga}$ -DOTATATE PET/CT,  $^{18}\text{F}$ -FDOPA PET/CT, and MRI (arrows), and negative for PHEO on  $^{18}\text{F}$ -FDA PET/CT, FDG PET/CT, and CT (arrowheads). Focal uptake in the right upper quadrant in the region of the liver and right ribs on  $^{18}\text{F}$ -FDA PET/CT (black arrow, C) corresponds to uptake in the dome of the gallbladder. Conspicuity score (CS) and  $\text{SUV}_{\text{max}}$  by reader 1 were as follows:  $^{18}\text{F}$ -FDOPA—CS: 5,  $\text{SUV}_{\text{max}}$ : 31.2;  $^{68}\text{Ga}$ -DOTATATE—CS: 5,  $\text{SUV}_{\text{max}}$ : 36.0;  $^{18}\text{F}$ -FDA—CS: 3,  $\text{SUV}_{\text{max}}$ : 20.8; FDG—CS: 1,  $\text{SUV}_{\text{max}}$ : 5.6; MRI—CS: 4; CT—CS: 3. Subsequent surgical resection confirmed PHEO.

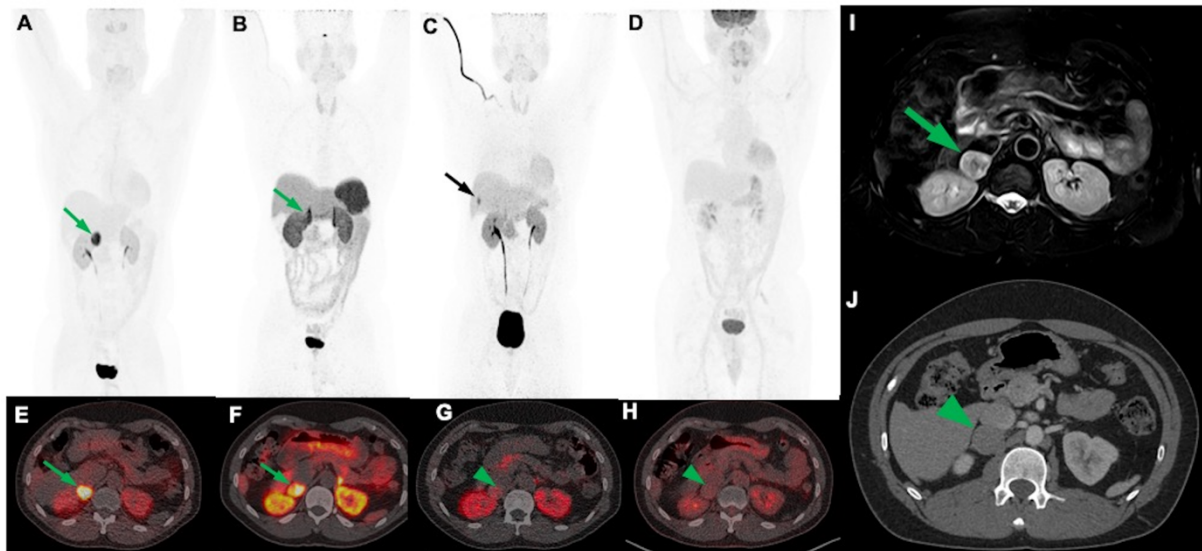

**Figure S2.** Multimodality imaging of 76-year-old woman (patient 12) with sporadic pheochromocytoma (PHEO), diagnosed by refractory hypertension on multiple antihypertensives, elevated urine normetanephrine and metanephrine, and left adrenal mass on prior ultrasound and CT. Maximum intensity projection PET images (A-C) and fused axial PET/CT images (D-F) using  $^{18}\text{F}$ -FDOPA (A, D),  $^{18}\text{F}$ -FDG (B, E), and  $^{68}\text{Ga}$ -DOTATATE (C, F), as well as axial contrast-enhanced T1-weighted MR image (G), and axial portal venous-phase contrast-enhanced CT image (H) show a left adrenal mass. Mass was deemed positive for PHEO on all tests (arrows) other than on  $^{68}\text{Ga}$ -DOTATATE PET/CT, on which it was deemed negative for PHEO (arrowhead). Conspicuity score (CS) and  $\text{SUV}_{\text{max}}$  by reader 1 were as follows:  $^{18}\text{F}$ -FDOPA—CS: 5,  $\text{SUV}_{\text{max}}$ : 11.6; FDG—CS: 5,  $\text{SUV}_{\text{max}}$ : 10.4;  $^{68}\text{Ga}$ -DOTATATE—CS: 2,  $\text{SUV}_{\text{max}}$ : 37.5; MRI—CS: 5; CT—CS: 5. Patient did not undergo  $^{18}\text{F}$ -FDG PET/CT. Subsequent surgical resection confirmed PHEO. False-negative interpretation on  $^{68}\text{Ga}$ -DOTATATE PET/CT was attributed to predominant photopenia within mass, with only a linear area of peripheral increased uptake anteriorly.

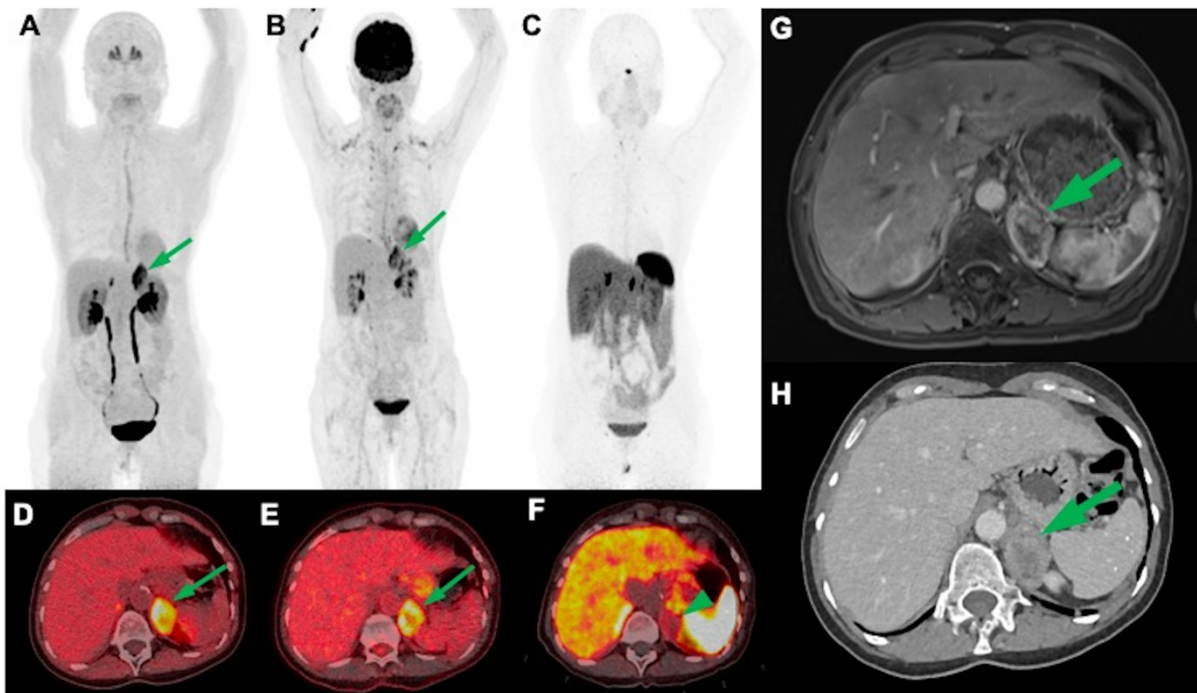



**Figure S3.** Multimodality imaging of 50-year-old woman (patient 9) referred with diagnosis for pheochromocytoma (PHEO). Patient had experienced symptoms of palpitations, anxiety, dizziness, sweating, hot flashes, headaches, blurry vision, exertional chest pain, shortness of breath, and fluctuating hypertensive episodes. Patient also had right adrenal mass on prior CT, which revealed PHEO on biopsy. Maximum intensity projection PET images (A-C) and fused axial PET/CT images (D-F) using  $^{18}\text{F}$ -FDOPA (A, D),  $^{68}\text{Ga}$ -DOTATATE (B, E), and FDG (C, F), as well as axial contrast-enhanced T1-weighted MR image (G), and axial portal venous-phase contrast-enhanced CT image (H) show a right adrenal mass. Mass was deemed positive for PHEO on  $^{18}\text{F}$ -DOPA PET/CT,  $^{18}\text{F}$ -FDG PET/CT, and MRI (arrows) and false-negative for PHEO on  $^{68}\text{Ga}$ -DOTATATE PET/CT and CT (arrowheads). Conspicuity score (CS) and  $\text{SUV}_{\text{max}}$  by reader 1 were as follows:  $^{18}\text{F}$ -FDOPA—CS: 5,  $\text{SUV}_{\text{max}}$ : 14.5;  $^{68}\text{Ga}$ -DOTATATE—CS: 3,  $\text{SUV}_{\text{max}}$ : 34.6; MRI—CS: 5; CT—CS: 3. For FDG PET/CT, a consensus CS of 5 was reached after joint review between the two readers, as their initial reads were discrepant (reader 1, CS: 3; reader 2, CS: 5) for whether lesion was negative (conspicuity score of 1-2) or positive (conspicuity score of 3-5) for PHEO. Reader 1 measured an  $\text{SUV}_{\text{max}}$  of this lesion of 11.5. Patient did not undergo  $^{18}\text{F}$ -FDA PET/CT. Subsequent surgical resection confirmed PHEO. False-negative interpretation on  $^{68}\text{Ga}$ -DOTATATE PET/CT was attributed to predominant photopenia within mass, with only a linear area of peripheral increased uptake anteriorly.

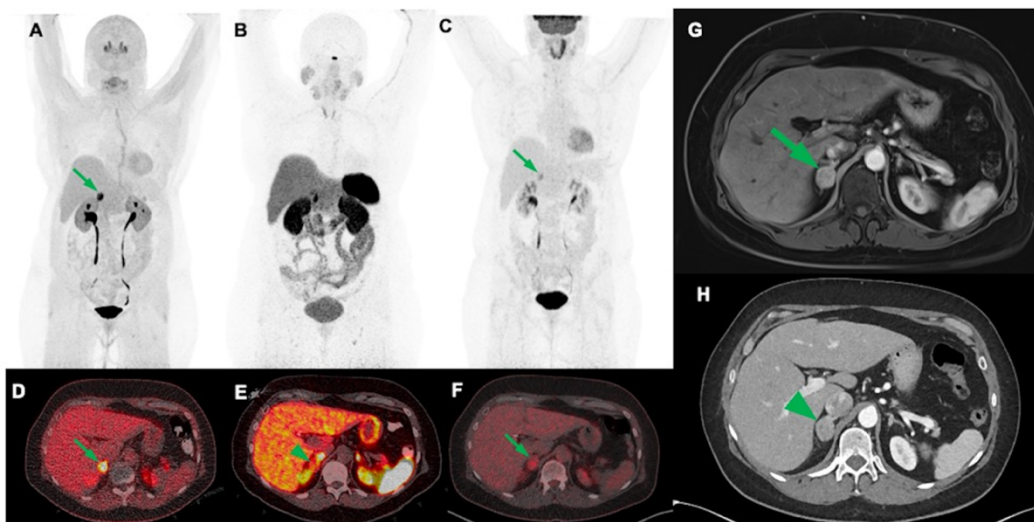

Supplement: NIHMS1917423-supplement-34431366_FrankLin_sm.pdf [file NIHMS1917423-supplement-34431366_FrankLin_sm.pdf]
